# Supplementary figures and images for: Direct observation of the Mottness and p–d orbital hybridization in the epitaxial monolayer α-RuCl3
Source: Royal Society of Chemistry journal article supplement (doi:10.1039/d2nr02827a), 2022-01-01

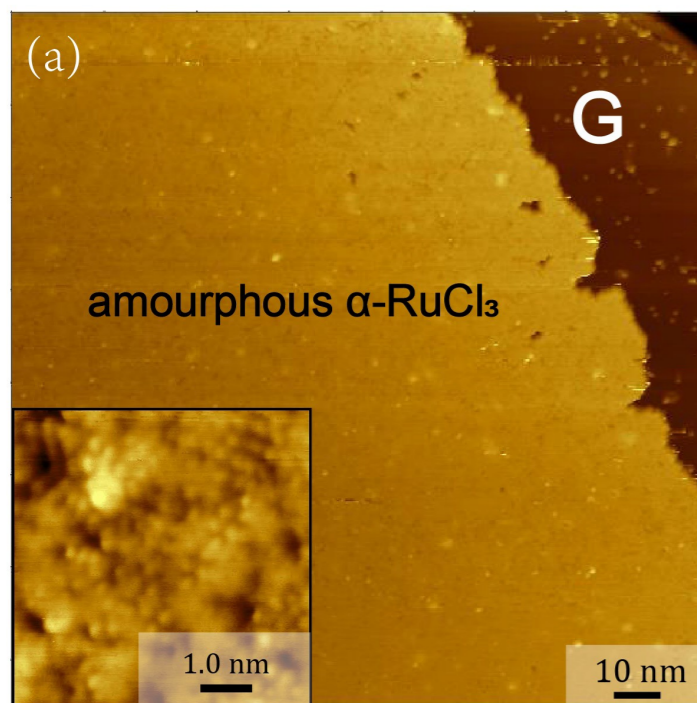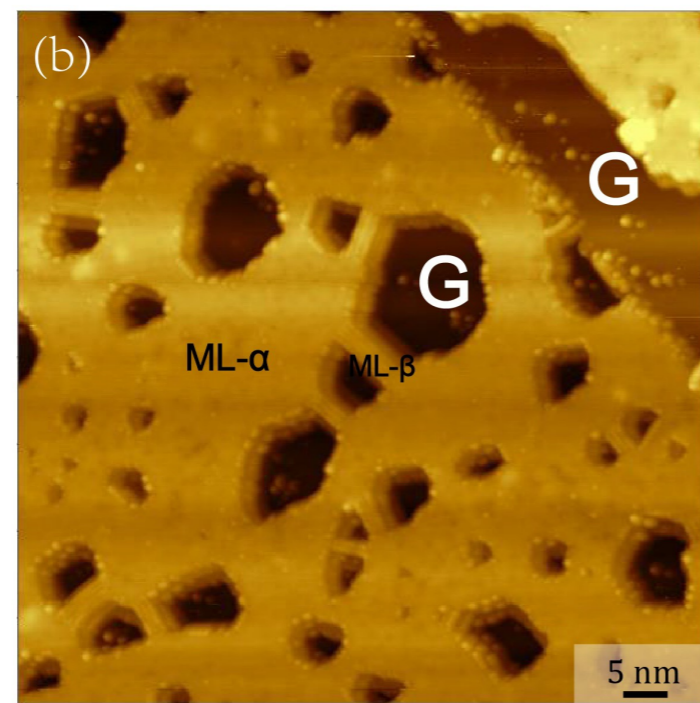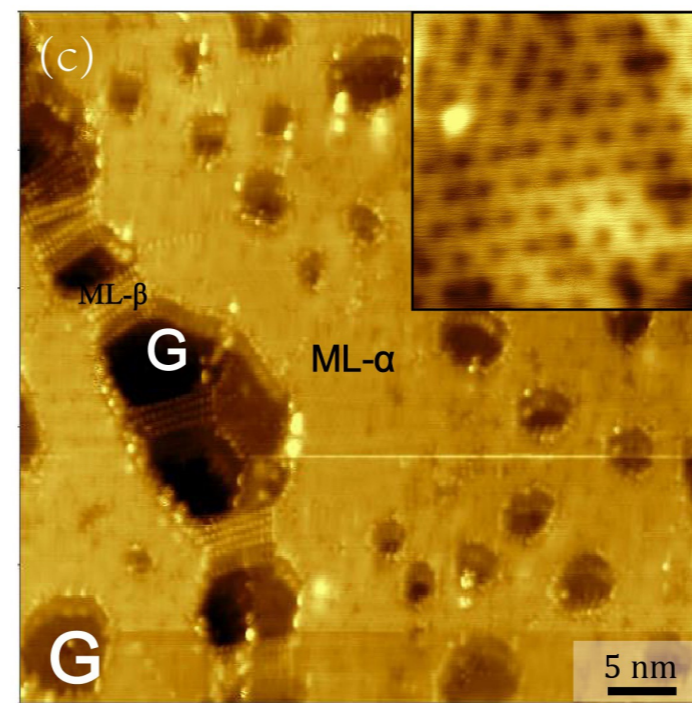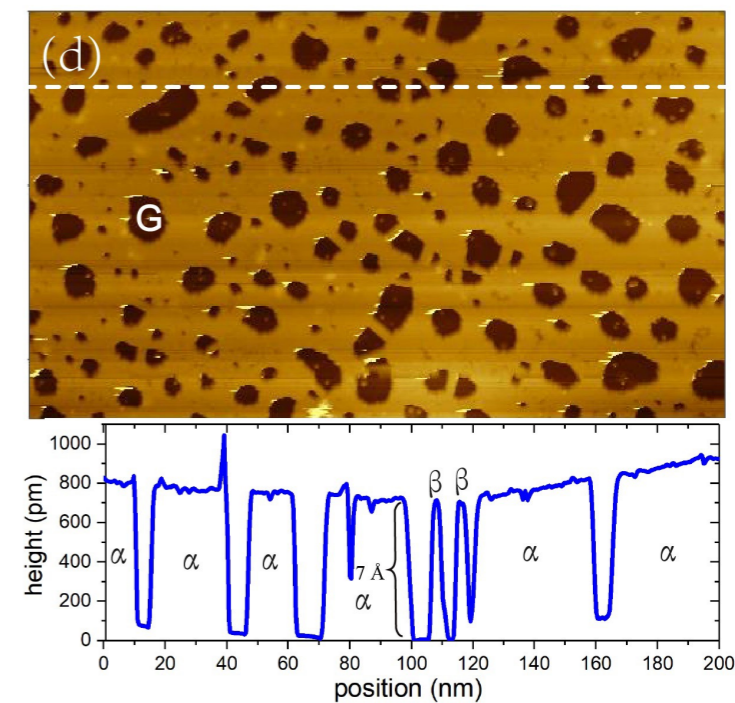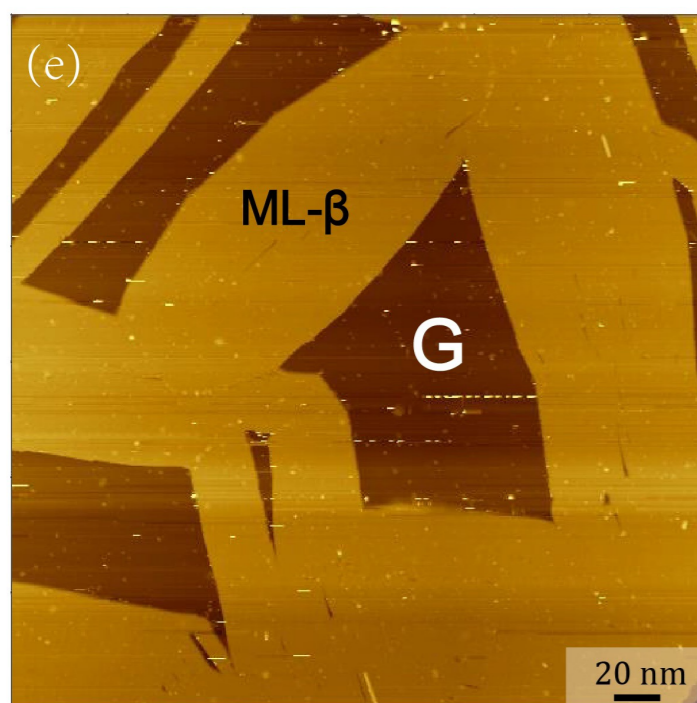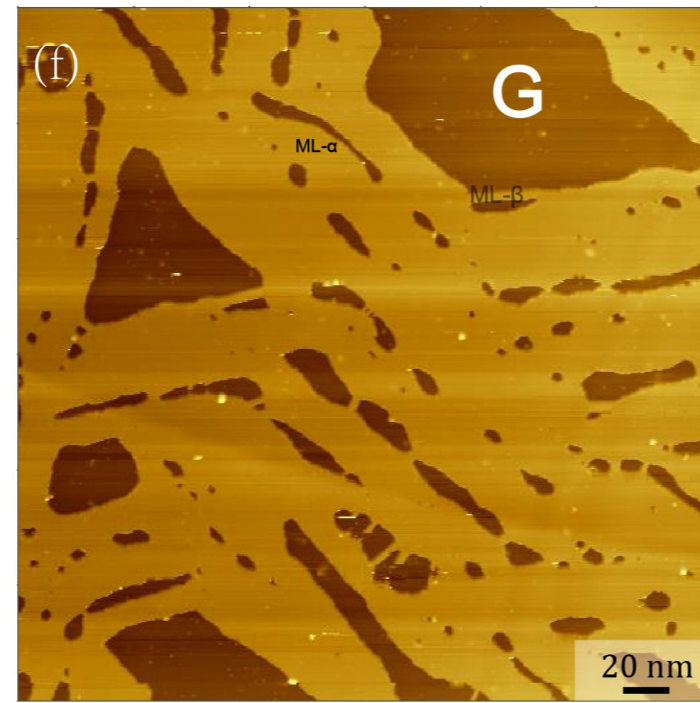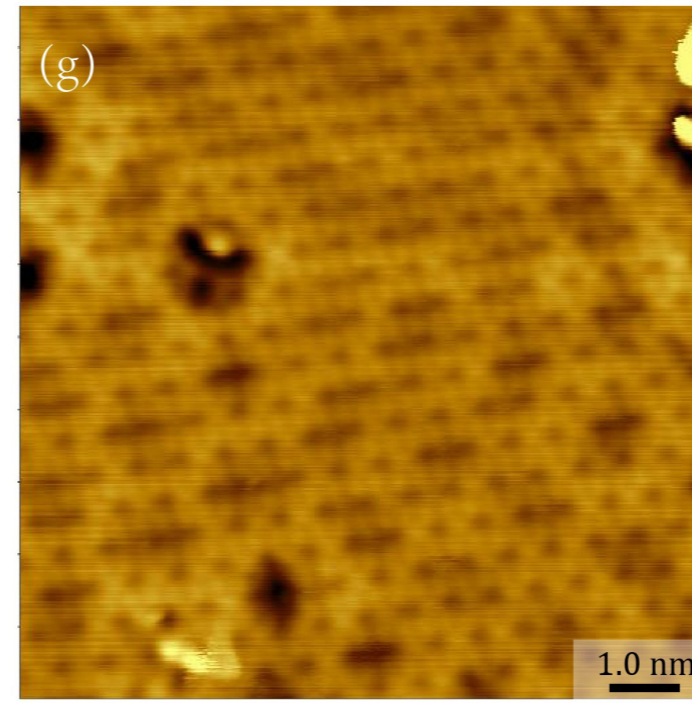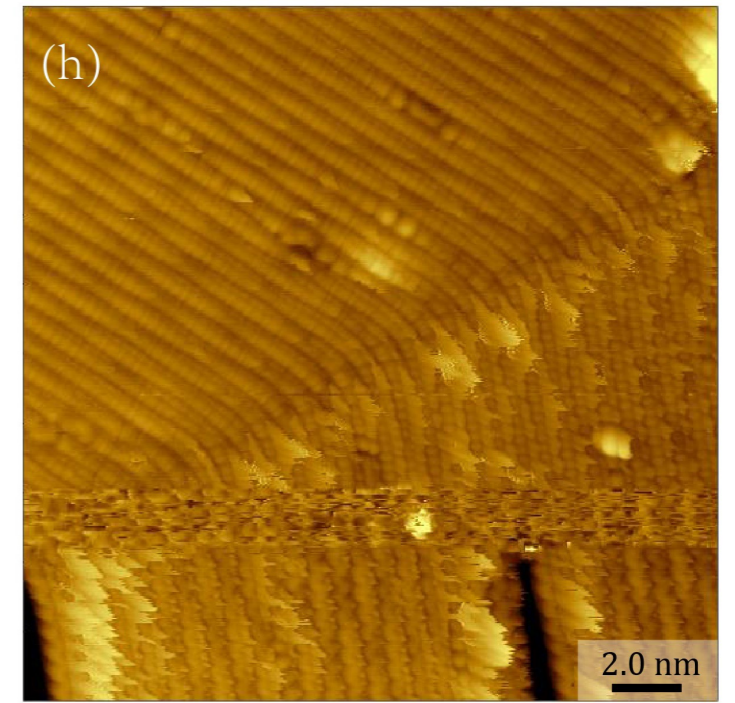

Supplement: d2nr02827a1.pdf [file d2nr02827a1.pdf]

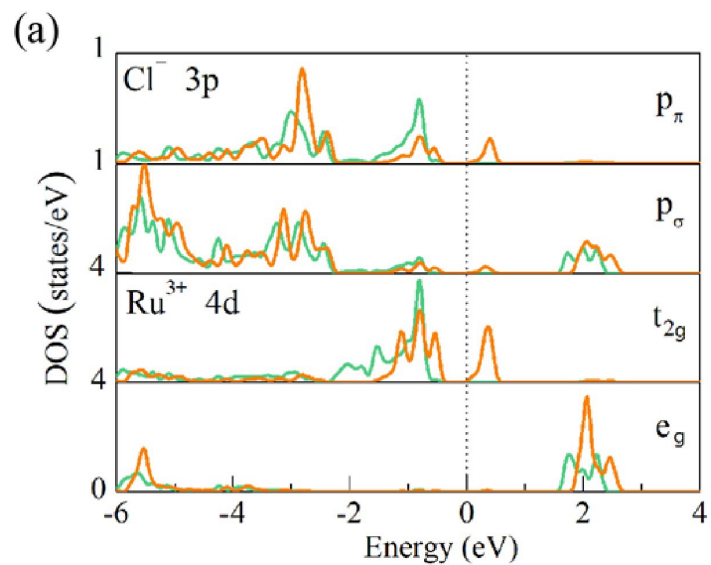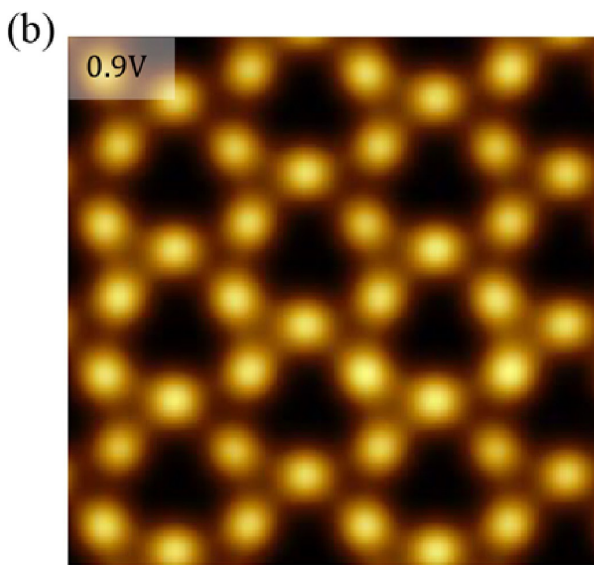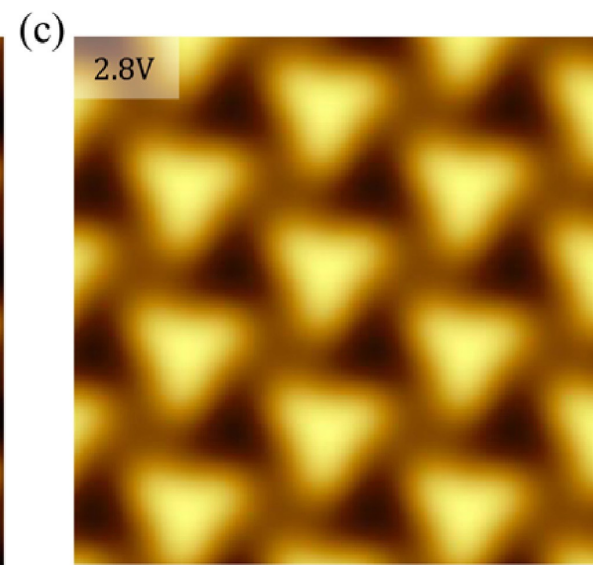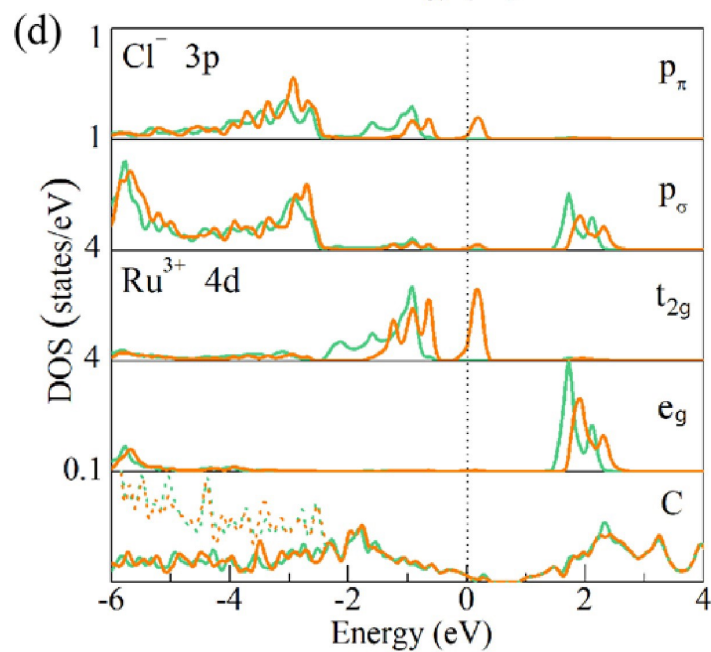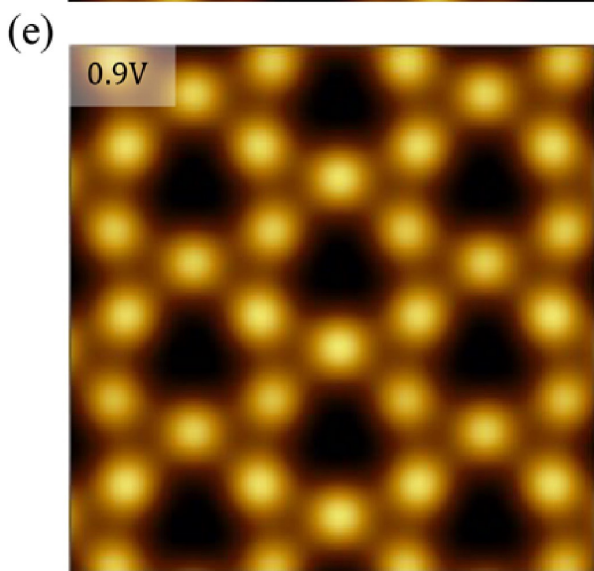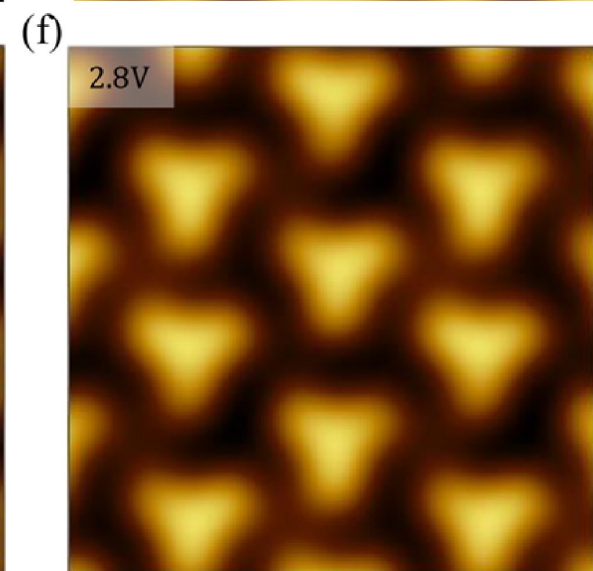

Supplement: d2nr02827a2.pdf [file d2nr02827a2.pdf]

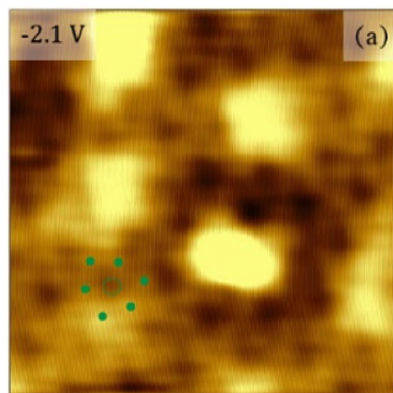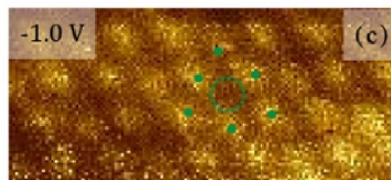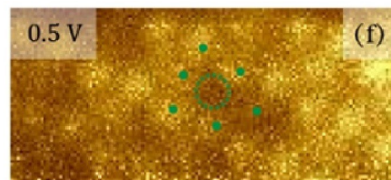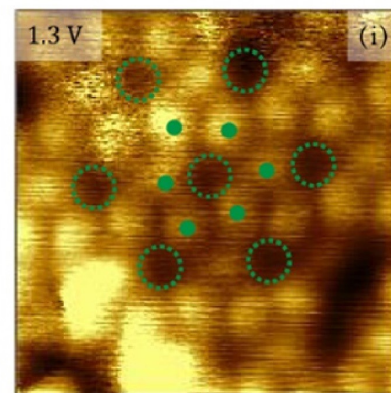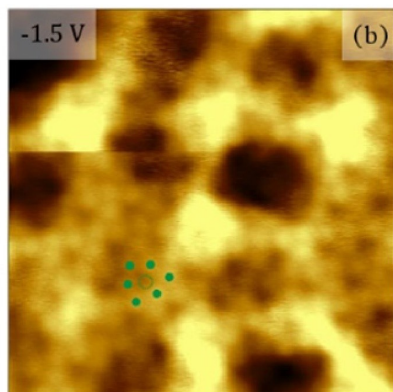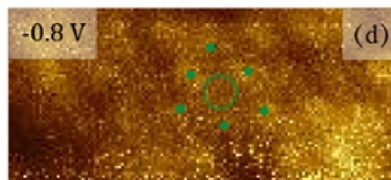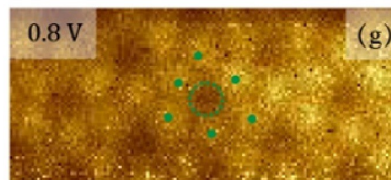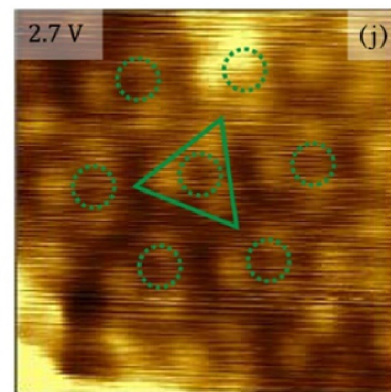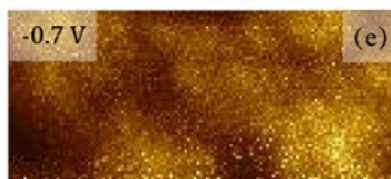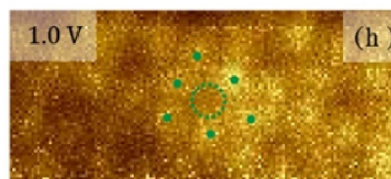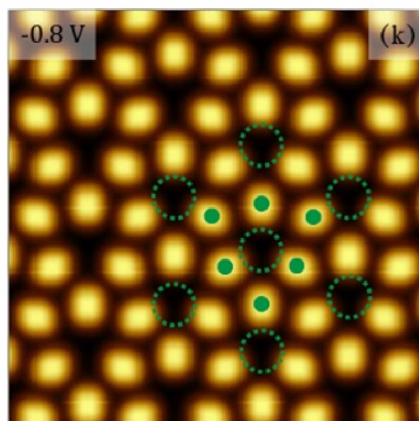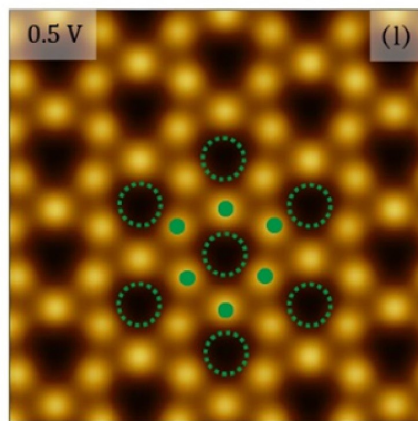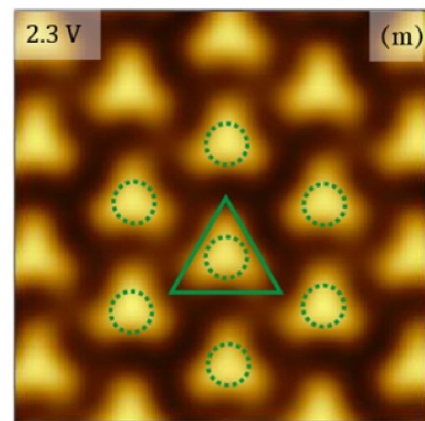

Supplement: d2nr02827a3.pdf [file d2nr02827a3.pdf]
